# Supplementary material for: A series of tetranuclear lanthanide complexes comprising two edge-sharing triangular units with field-induced slow magnetic relaxation for Dy4 species
Source: Royal Society of Chemistry journal article supplement (doi:10.1039/c1dt10654f), 2011-01-01
Supplement: c1dt10654f.pdf [file c1dt10654f.pdf]

## Supporting Information

### Series of tetranuclear lanthanide complexes comprising two edge-sharing triangular units with field-induced **slow magnetic relaxation** for Dy<sub>4</sub> species

Shufang Xue, Lang Zhao, Yun-Nan Guo, Ruiping Deng, Yang Guo and Jinkui Tang\*

*<sup>a</sup>State Key Laboratory of Rare Earth Resource Utilization, Changchun Institute of Applied Chemistry, Chinese Academy of Sciences, Changchun 130022, P. R. China. Fax: 86 431 85262878; Tel: 86 431 8526278; E-mail: tang@ciac.jl.cn*

*<sup>b</sup>School of Material Science and Engineering, Changchun University of Science and Technology, Changchun 130022, China*

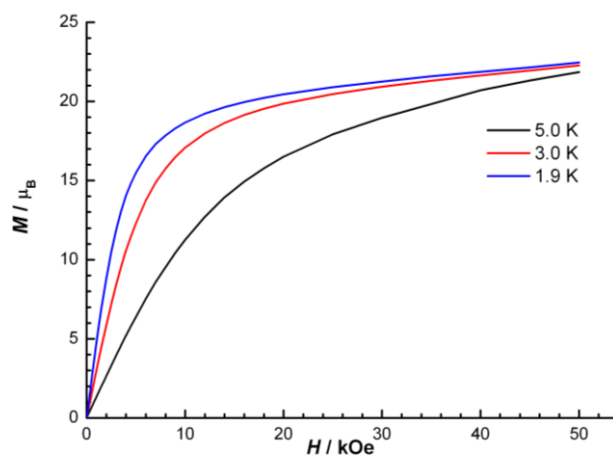

Fig S1  $M$  vs.  $H$  plot at different temperatures below 5 K for **3**.

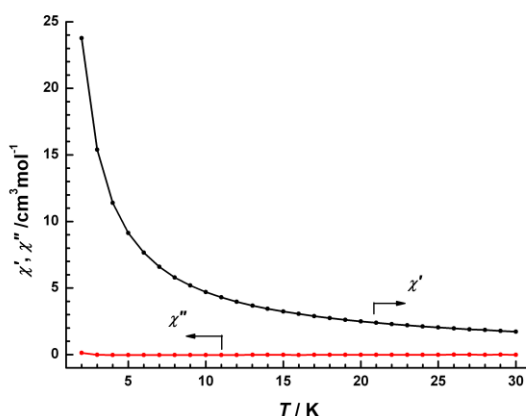

Fig S2 Temperature dependences of  $\chi'$  (black) and  $\chi''$  (red) of **3** measured in an 0 Oe external dc field.

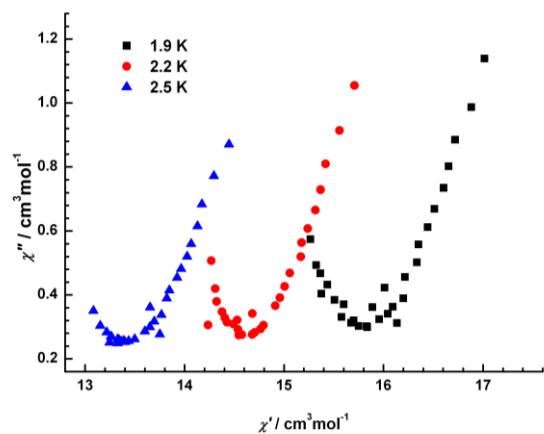

**Figure S3.** Cole-Cole diagram taken for **3** in the temperature range 1.90–250 K under a dc field of 1200 Oe.
